# Supplementary material for: A novel AIE fluorescent probe for the monitoring of aluminum ions in living cells and zebrafish
Source: Royal Society of Chemistry journal article supplement (doi:10.1039/d2an00543c), 2022-01-01
Supplement: d2an00543c1.pdf [file d2an00543c1.pdf]

## Supporting Information

### **A novel AIE fluorescent probe for the monitor of aluminum ion in living cells and zebrafish**

Yabing Gan,<sup>b</sup> Guoxing Yin,<sup>b</sup> Jianhua Wang\*<sup>a</sup> and Peng Yin\*<sup>b</sup>

<sup>a</sup> *Changsha Hospital of Hunan Normal University, The Fourth Hospital of Changsha, Changsha 410081, China.*

<sup>b</sup> *College of Chemistry and Chemical Engineering, Hunan Normal University, Changsha 410081, China.*

*E-mail: wjhcssyy@163.com; yinpeng@hunnu.edu.cn*

#### **Table of Contents**

|                                                            |           |
|------------------------------------------------------------|-----------|
| <b>I. Experimental Section .....</b>                       | <b>2</b>  |
| <b>II. Supplementary Spectra .....</b>                     | <b>6</b>  |
| <b>III. <sup>1</sup>H NMR and <sup>13</sup>C NMR .....</b> | <b>11</b> |
| <b>IV. Reference .....</b>                                 | <b>14</b> |

## I. Experimental Section

### Cell culture

BEL-7402 were obtained from China Center for Type Culture Collection (Wuhan, China). BEL-7402 cells were cultured in minimal essential medium(MEM) with 10% (V/V) heat-inactivated fetal bovine serum (FBS) (Gibco BRL, Grand Island, NY, USA), streptomycin/penicillin (100 µg/mL) in a humidified incubator of 5% CO<sub>2</sub> and 95% air at 37 °C.

### MTT assay

Cell cytotoxicity was evaluated by MTT assay. Cells were cultivated in a 96-well plate until 50-70% confluence, and then incubated with different concentrations of probe BTD (0-5 µM) for 24 h. Then 20 µL 3-(4,5-dimethyl-2-thiazolyl)-2,5-diphenyltetrazolium bromide (MTT, 5 mg/ mL) was added for 4 h at 37 °C. After removing MTT, 150 µL DMSO was added. Absorbance was measured at 570 nm with a Varioskan Flash (Thermo Fisher Scientific, Waltham, MA, USA). All experiments were repeated three times, and the data were presented as the percentage of control cells.

### Quantum yield measurements

Quinine sulfate ( $\Phi = 0.54$  in 0.1 M H<sub>2</sub>SO<sub>4</sub>) was used as quantum yield reference. The QY<sub>s</sub> were determined by comparing the integrated fluorescence intensity and the absorbance value of the probe solution samples with those of the references. The absorbances (less than 0.05 at the excitation wavelength) at maximal absorbance for probe BTD-Al<sup>3+</sup> and Fluorescein were recorded. The slope method was used to calculate the QY<sub>s</sub> using the equation:

$$QY_u = QY_s (m_u/m_s) (n_u/n_s)^2.$$

Where QY is the quantum yield, m is the slope determined by the curves. And n is the refractive index (1.33 for 0.1 M H<sub>2</sub>SO<sub>4</sub> aqueous solution at room temperature). The subscript “s” refers to the standards and “u” refers to the unknown samples. A series of concentrations for the references and the required samples were measured to obtain the slopes.

$$QY_{Al^{3+}} = 0.157$$

### Calculation of the detection limit (LOD)

$$LOD = 3\sigma/S$$
$$\sigma = \sqrt{\frac{\sum (\bar{x} - x_i)^2}{n - 1}}$$

$\sigma$ : the standard deviation of the blank solution.

$\bar{x}$  is the mean of the blank measures;  $x_i$  is the values of blank measures; n is the number of tested blank measure (n = 10)

S: the slope of the linear calibration plot between the fluorescence emission intensity and the concentration of Al<sup>3+</sup> respectively.

**Table S1.** Summary of the properties of representative fluorescent probes for selective detection of Al<sup>3+</sup>

| probe | Tested Media | DL | Linear | Quantum | Recovery | Ref. |
|-------|--------------|----|--------|---------|----------|------|
|-------|--------------|----|--------|---------|----------|------|

|                                                                                     |                                  |         | range          | yield     |                |   |
|-------------------------------------------------------------------------------------|----------------------------------|---------|----------------|-----------|----------------|---|
| 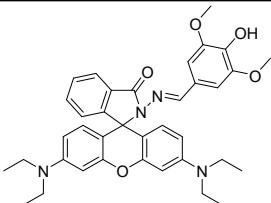   | EtOH/HEPES<br>(1/5)              | 10.6 nM | 1.0-10.0<br>μM | ---       | F <sup>-</sup> | 1 |
|    | DMF/H <sub>2</sub> O<br>(1:1)    | 99 nM   | 0-12 μM        | ---       | ---            | 2 |
|    | H <sub>2</sub> O                 | 21.6 nM | 0.1-5 μM       | ---       | EDTA           | 3 |
|    | PBS/DMSO<br>(3:1)                | 42.6 nM | 0-40 μM        | 0.27      | ---            | 4 |
|  | H <sub>2</sub> O                 | 50 nM   | 0-10 μM        | 0.10-0.35 | ---            | 5 |
|  | EtOH/H <sub>2</sub> O<br>(2:3)   | 24 nM   | 0.2-10<br>μM   | 0.41      | ---            | 6 |
|  | DMSO/H <sub>2</sub> O<br>(1:100) | 603 nM  | 0-8 μM         | 0.64      | ---            | 7 |

|                                                                                     |                                              |              |                      |        |                |                   |
|-------------------------------------------------------------------------------------|----------------------------------------------|--------------|----------------------|--------|----------------|-------------------|
| 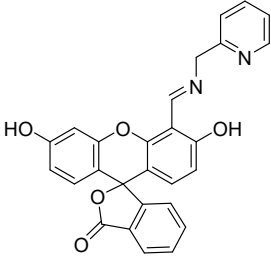   | Tris-HCl<br>aqueous buffer                   | 92 nM        | 0-10 $\mu$ M         | 0.09   | F <sup>-</sup> | 8                 |
|    | EtOH                                         | 200 nM       | 1-15 $\mu$ M         | ---    | ---            | 9                 |
|    | CH <sub>3</sub> CN/H <sub>2</sub> O<br>(1:3) | 750 nM       | 0-20 $\mu$ M         | ---    | ---            | 10                |
|    | MeOH/H <sub>2</sub> O<br>(19:1)              | 924 nM       | 0-30 $\mu$ M         | 0.1974 | F <sup>-</sup> | [11 <sup>11</sup> |
|   | EtOH/H <sub>2</sub> O<br>(3:1)               | 10 nM        | 5.0-50<br>mM         | ---    | F <sup>-</sup> | 12                |
|  | MeOH/HEPES<br>(8:2)                          | 3.10 $\mu$ M | 1-10 $\mu$ M         | ---    | ---            | 13                |
|  | DMF/H <sub>2</sub> O<br>(1:1)                | 14.2 $\mu$ M | 0-5 $\mu$ M          | ---    | EDTA           | 14                |
|  | DMSO/H <sub>2</sub> O<br>(8:2)               | 430 nM       | 0-10 $\mu$ M         | ---    | ---            | 15                |
|  | C <sub>2</sub> H <sub>5</sub> OH             | 75.5 nM      | 3-6.5 $\mu$ M        | 0.3246 | EDTA           | 16                |
|  | MeOH/H <sub>2</sub> O<br>(8:2)               | 2.73<br>nM   | 0.04-0.14<br>$\mu$ M | ---    | ---            | 17                |

|                                                                                   |                                                         |         |             |       |     |           |
|-----------------------------------------------------------------------------------|---------------------------------------------------------|---------|-------------|-------|-----|-----------|
| 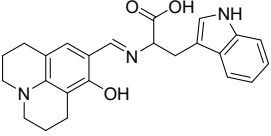 | bis-tris buffer solution                                | 640 nM  | 0-250 μM    | ---   | --- | 18        |
|  | C <sub>2</sub> H <sub>5</sub> OH/H <sub>2</sub> O (1:1) | 11.9 nM | 0-40 μM     | ---   | --- | 19        |
|  | H <sub>2</sub> O                                        | 3.25 nM | 1.0-10.0 μM | 0.157 | Lys | This Work |

## II. Supplementary Spectra

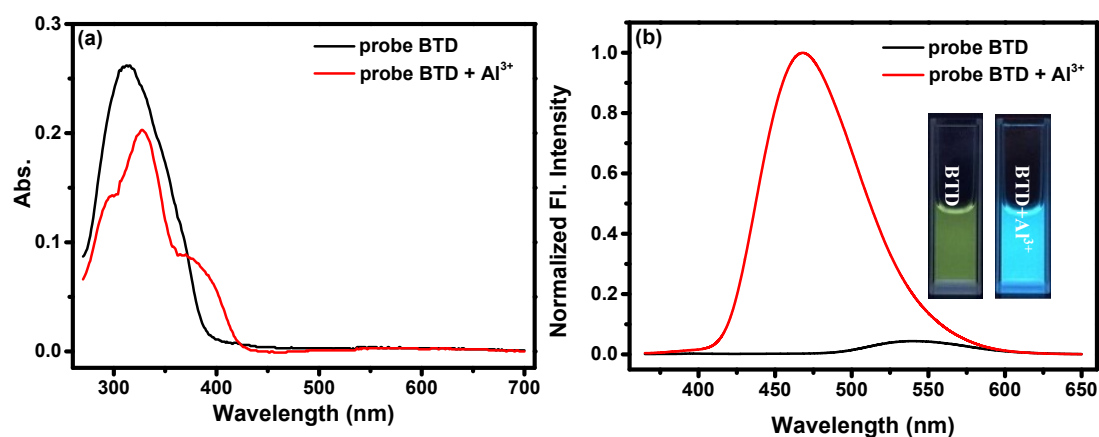

**Fig. S1** (a) Absorption spectra of probe BTM (10  $\mu\text{M}$ ) in the absence and presence of  $\text{Al}^{3+}$  (100  $\mu\text{M}$ ) in pure water (containing 1% DMSO). (b) The corresponding normalized fluorescence spectra.  $\lambda_{\text{ex}} = 345$  nm, slit (nm): 2.5/2.5. The inset photos show the color changes of probe BTM (10  $\mu\text{M}$ ) in the absence and presence of 10 equiv. of  $\text{Al}^{3+}$  under UV lamp at 365 nm, respectively.

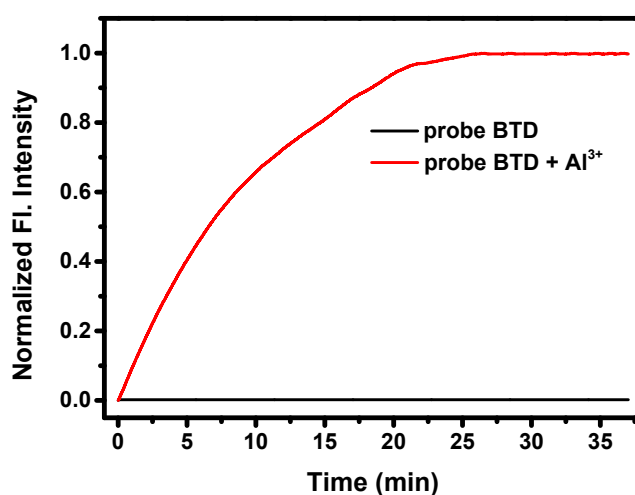

**Fig. S2** Time-dependent normalized fluorescence intensity changes at 470 nm of probe BTM (10  $\mu\text{M}$ ) in the absence and presence of  $\text{Al}^{3+}$  (100  $\mu\text{M}$ ) in pure water (containing 1% DMSO).  $\lambda_{\text{ex}} = 345$  nm, slit (nm): 2.5/2.5.

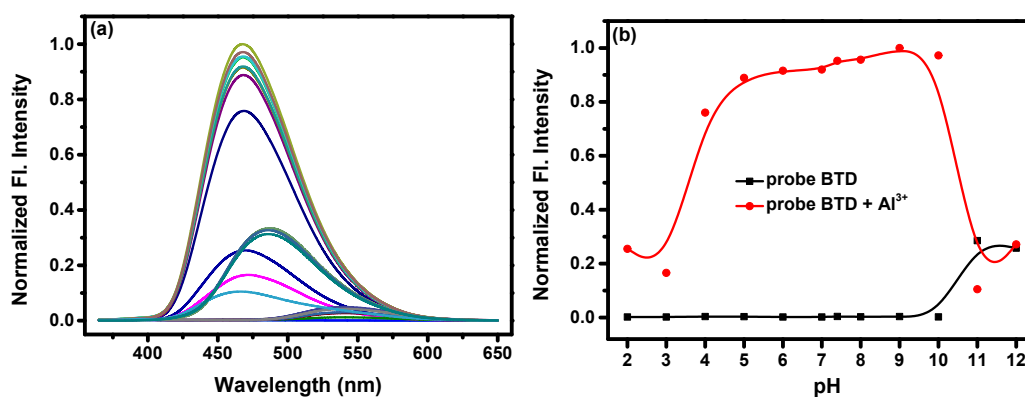

**Fig. S3** (a) Normalized fluorescence spectra of probe BTD (10  $\mu\text{M}$ ) in the absence and presence of  $\text{Al}^{3+}$  in pure water (containing 1% DMSO) under different pH. (b) The corresponding normalized fluorescence intensity changes at 470 nm.  $\lambda_{\text{ex}} = 345 \text{ nm}$ , slit (nm): 2.5/2.5.

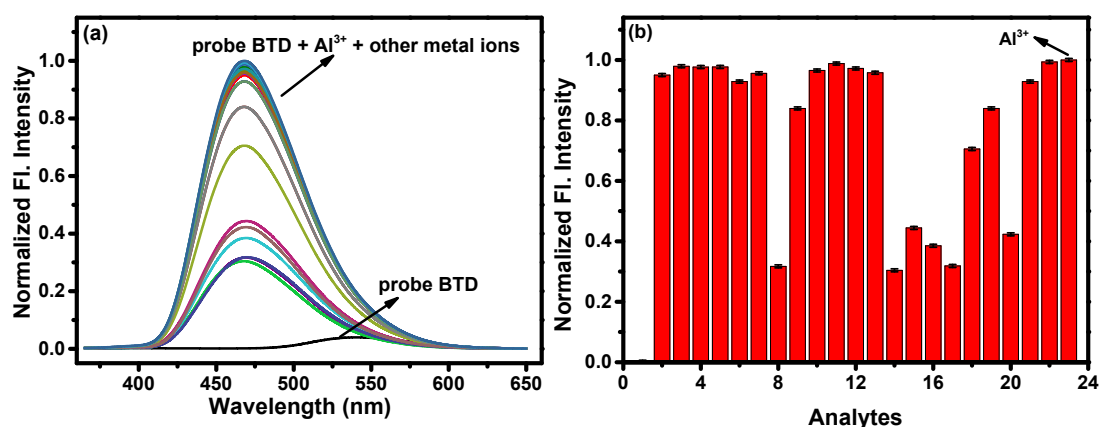

**Fig. S4** (a) Normalized fluorescence spectra of the probe BTD (10  $\mu\text{M}$ ) to other metal ions (100  $\mu\text{M}$ ) and  $\text{Al}^{3+}$  (100  $\mu\text{M}$ ) in pure water (containing 1% DMSO). (b) The corresponding normalized fluorescence intensity changes at 470 nm. Other metal ions including: 1. None; 2.  $\text{Na}^+$ ; 3.  $\text{K}^+$ ; 4.  $\text{Li}^+$ ; 5.  $\text{Ag}^+$ ; 6.  $\text{Ba}^{2+}$ ; 7.  $\text{Ca}^{2+}$ ; 8.  $\text{Co}^{2+}$ ; 9.  $\text{Zn}^{2+}$ ; 10.  $\text{Mg}^{2+}$ ; 11.  $\text{Mn}^{2+}$ ; 12.  $\text{Pb}^{2+}$ ; 13.  $\text{Cd}^{2+}$ ; 14.  $\text{Cu}^{2+}$ ; 15.  $\text{Sn}^{2+}$ ; 16.  $\text{Fe}^{2+}$ ; 17.  $\text{Fe}^{3+}$ ; 18.  $\text{Cr}^{3+}$ ; 19.  $\text{Bi}^{3+}$ ; 20.  $\text{Ni}^{2+}$ ; 21.  $\text{Zr}^{4+}$ ; 22.  $\text{Ge}^{4+}$ ; 23.  $\text{Al}^{3+}$ .  $\lambda_{\text{ex}} = 345 \text{ nm}$ , slit (nm): 2.5/2.5.

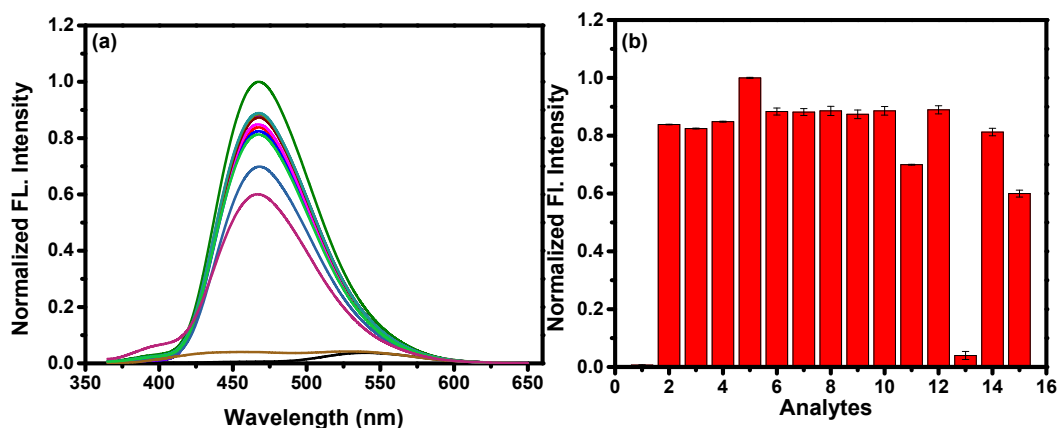

**Fig. S5** (a) Normalized fluorescence spectra of probe BTD (10  $\mu\text{M}$ )- $\text{Al}^{3+}$  (100  $\mu\text{M}$ ) upon addition of various analytes (200  $\mu\text{M}$ ) in pure water (containing 1% DMSO) at 37  $^{\circ}\text{C}$ . (b) The corresponding normalized fluorescence intensity changes at 470 nm. Analytes: 1. probe BTD; 2. probe BTD and  $\text{Al}^{3+}$ ; 3. Cys; 4. Hcy; 5. GSH; 6.  $\text{Na}_2\text{S}$ ; 7.  $\text{Na}_2\text{SO}_3$ ; 8. Gly; 9. Glu; 10. Met; 11. Asp; 12. Thr; 13. Lys; 14. Try; 15. His.  $\lambda_{\text{ex}} = 345 \text{ nm}$ , slit(nm): 2.5/2.5.

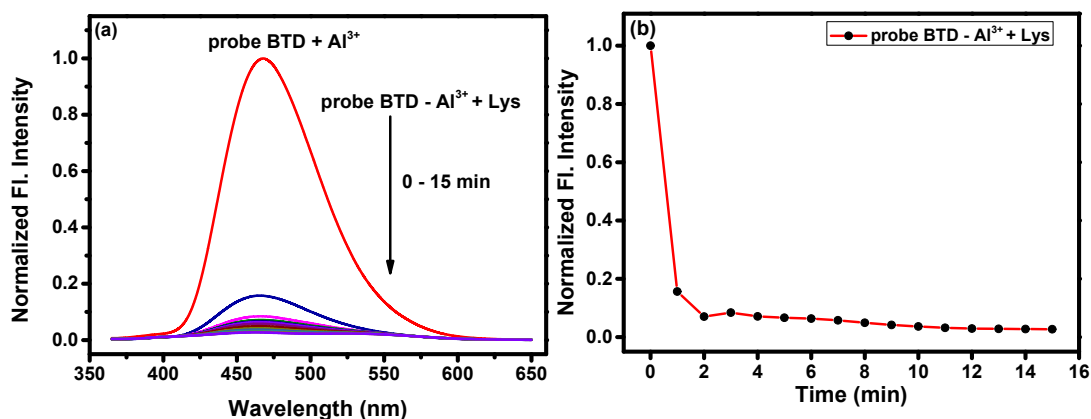

**Fig. S6** (a) Time dependent normalized fluorescence intensity spectra of probe BTD (10  $\mu\text{M}$ ) and Al<sup>3+</sup> (100  $\mu\text{M}$ ) in the presence of Lys (500  $\mu\text{M}$ ) in pure water (containing 1% DMSO). (b) The corresponding normalized time-dependent fluorescence intensity changes at 470 nm.  $\lambda_{\text{ex}} = 345$  nm, slit (nm): 2.5/2.5.

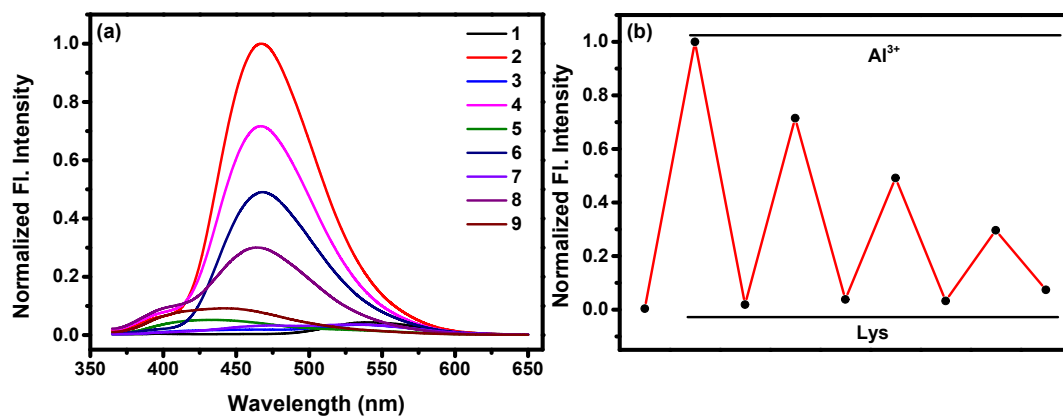

**Fig. S7** (a) Change of normalized fluorescence of probe BTD (10  $\mu\text{M}$ ) after alternate addition of Al<sup>3+</sup> (50  $\mu\text{M}$ ) and Lys (100  $\mu\text{M}$ ) in pure water (containing 1% DMSO) at 37  $^{\circ}\text{C}$ . Line 1 (probe BTD), line 2 (probe BTD + Al<sup>3+</sup>), line 3 (probe BTD + Al<sup>3+</sup> + Lys), line 4 (probe BTD + Al<sup>3+</sup> + Lys + Al<sup>3+</sup>), line 5 (probe BTD + Al<sup>3+</sup> + Lys + Al<sup>3+</sup> + Lys), line 6 (probe BTD + Al<sup>3+</sup> + Lys + Al<sup>3+</sup> + Lys + Al<sup>3+</sup>), line 7 (probe BTD + Al<sup>3+</sup> + Lys + Al<sup>3+</sup> + Lys + Al<sup>3+</sup> + Lys), line 8 (probe BTD + Al<sup>3+</sup> + Lys + Al<sup>3+</sup> + Lys + Al<sup>3+</sup> + Lys + Al<sup>3+</sup>), line 9 (probe BTD + Al<sup>3+</sup> + Lys + Al<sup>3+</sup> + Lys + Al<sup>3+</sup> + Lys + Al<sup>3+</sup> + Lys). (b) Reversibility of the reactions of the probe with Al<sup>3+</sup> and Lys. Each spectrum was recorded after addition of the Al<sup>3+</sup>/Lys and shaken well.  $\lambda_{\text{ex}} = 345$  nm,  $\lambda_{\text{em}} = 470$  nm, slit (nm): 2.5/2.5.



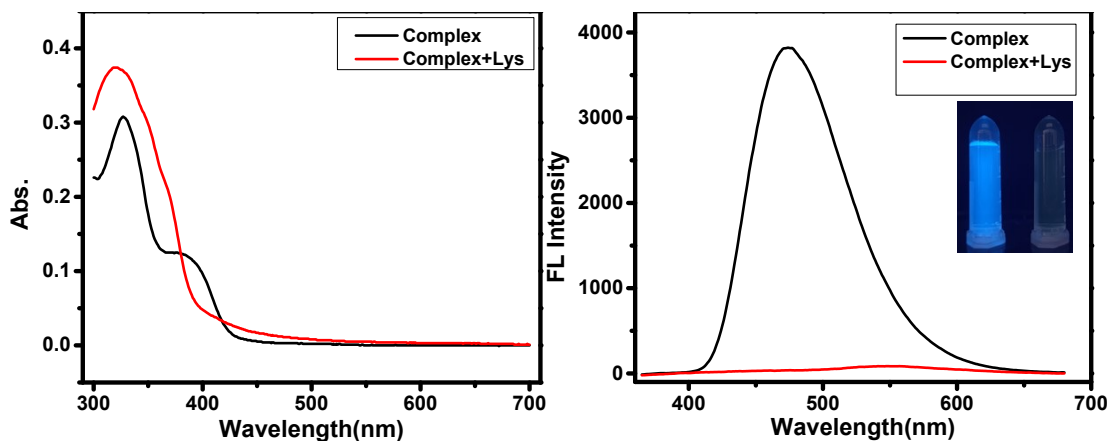

**Fig. S8** (a) Absorption spectra of complex in the absence and presence of Lys in pure water (containing 1% DMSO). (b) The corresponding fluorescence spectra.  $\lambda_{\text{ex}} = 345$  nm, slit (nm): 2.5/2.5. The inset photos show the color changes of complex in the absence and presence of 10 equiv. of Lys under UV lamp at 365 nm.

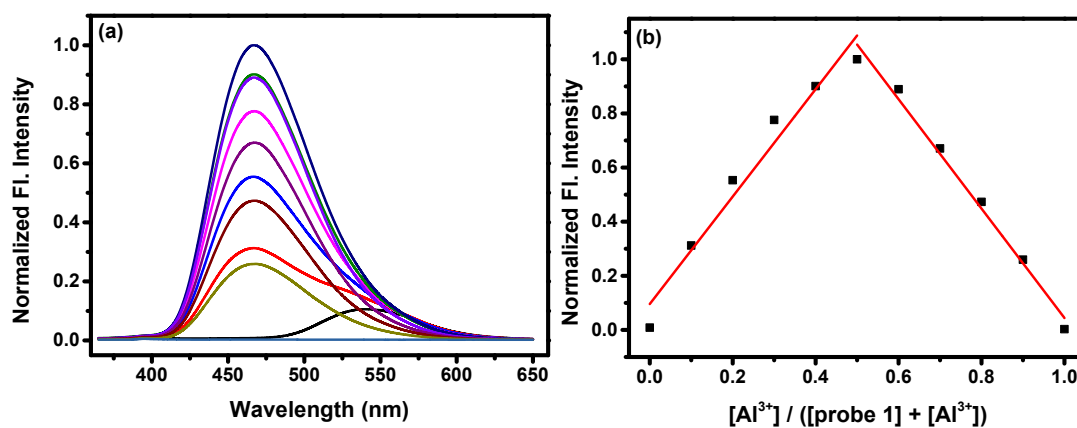

**Fig. S9** (a) Normalized fluorescence intensity spectra for the binding of probe BTB with  $\text{Al}^{3+}$  in pure water (containing 1% DMSO). (b) The corresponding normalized fluorescence intensity at 470 nm was plotted as a function of the molar ratio of  $[\text{Al}^{3+}] / ([\text{probe BTB}] + [\text{Al}^{3+}])$ .  $\lambda_{\text{ex}} = 345$  nm, slit (nm): 2.5/2.5.

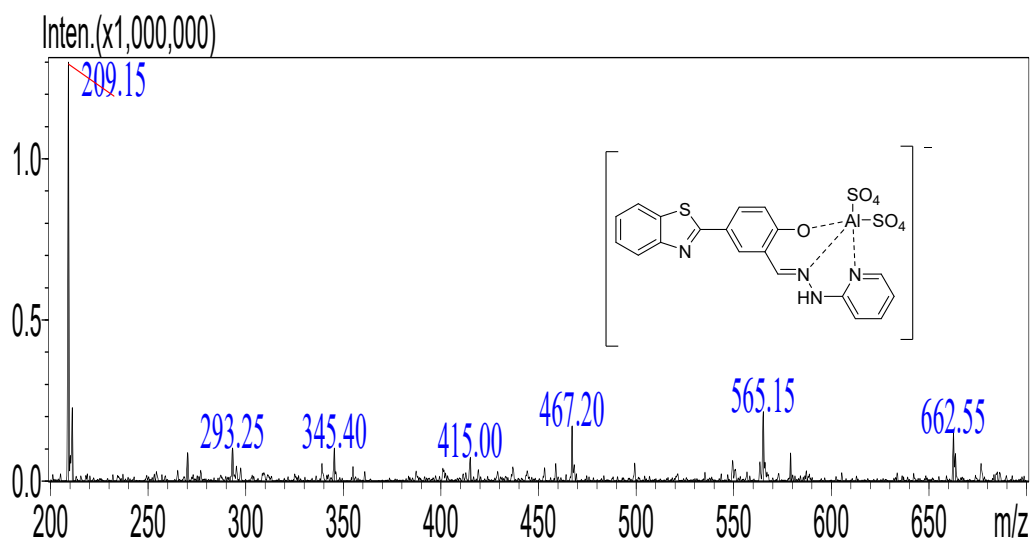

Fig. S10 Mass spectra of probe BTM after treated with Al<sup>3+</sup>.

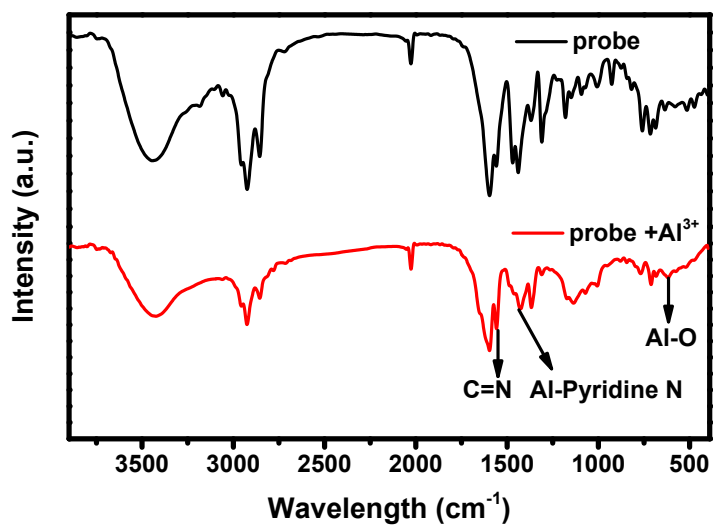

Fig. S11 FT-IR spectra of probe BTM and probe BTM with Al<sup>3+</sup>.

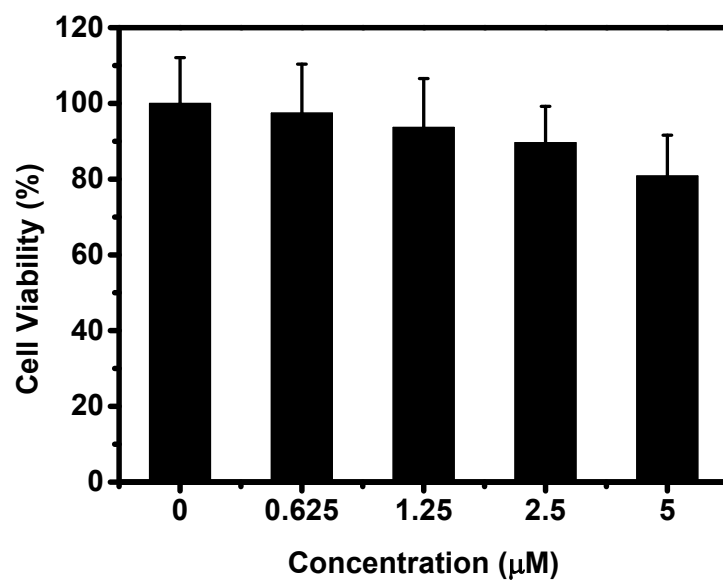

**Fig. S12** MTT assay for the survival rate of living BEL-7402 cells treated with various concentrations of probe BTM for 24 h.

### III. $^1\text{H}$ NMR and $^{13}\text{C}$ NMR

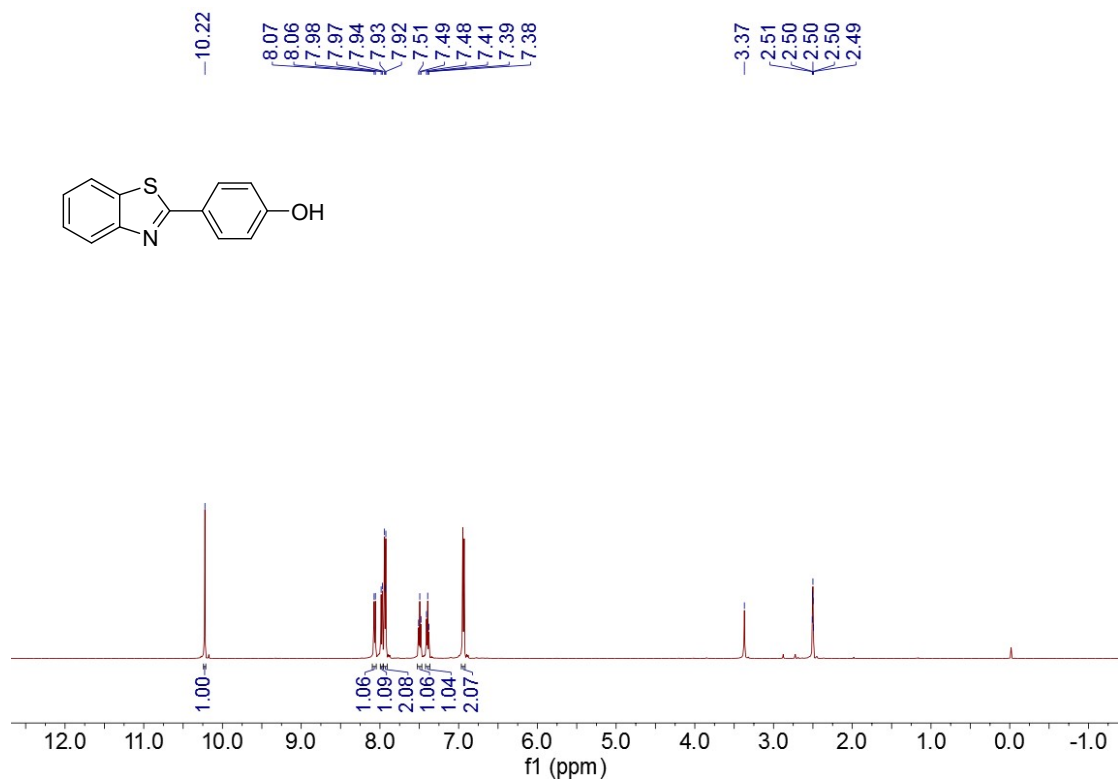

Fig. S13  $^1\text{H}$  NMR spectrum of compound 1 in DMSO- $d_6$ .

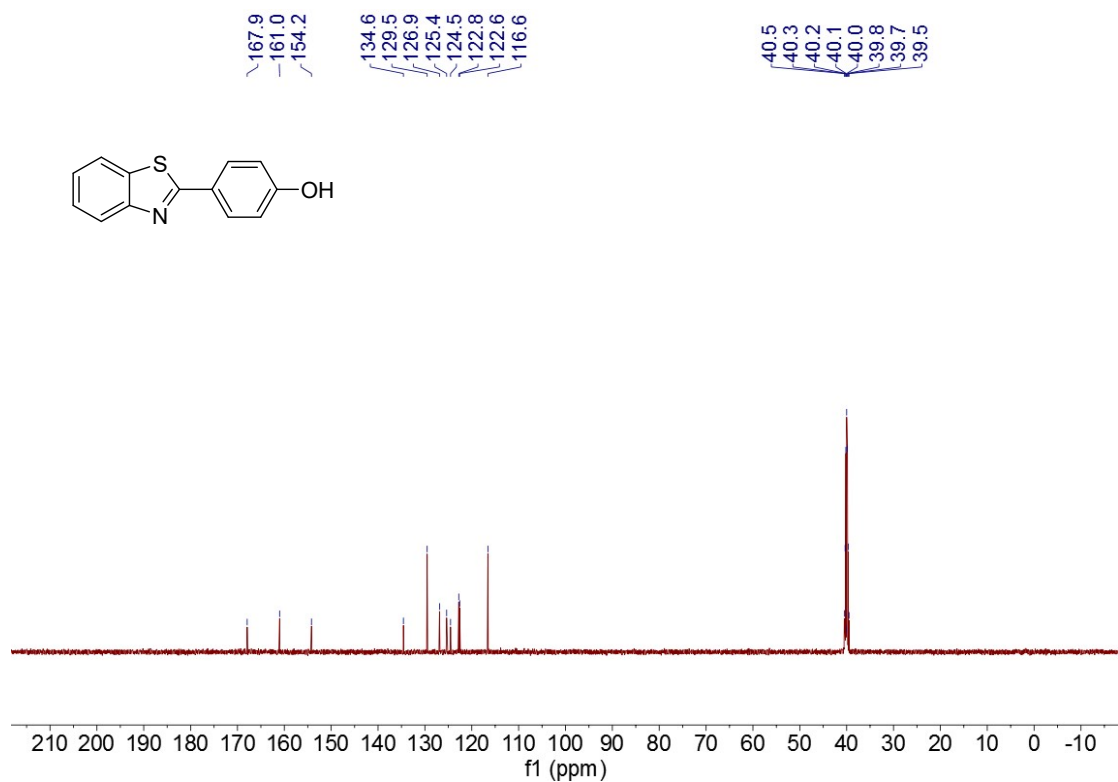

Fig. S14  $^{13}\text{C}$  NMR spectrum of compound 1 in DMSO- $d_6$ .

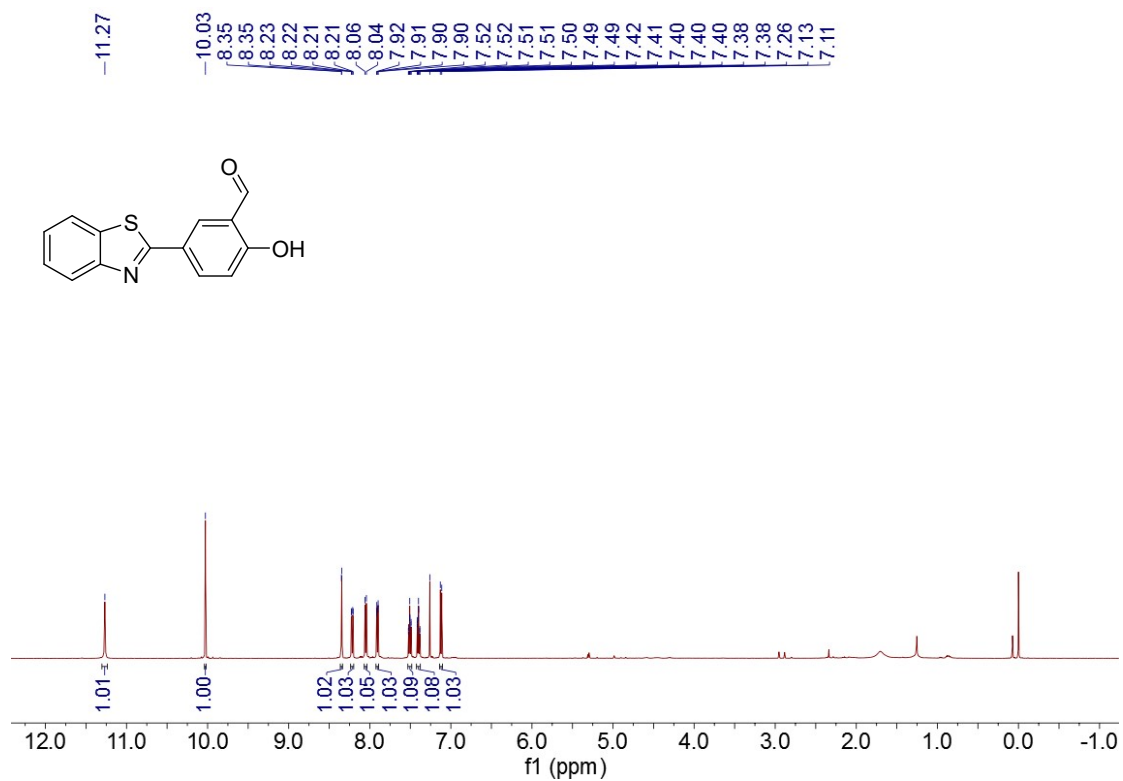

Fig. S15 <sup>1</sup>H NMR spectrum of compound 2 in CDCl<sub>3</sub>.

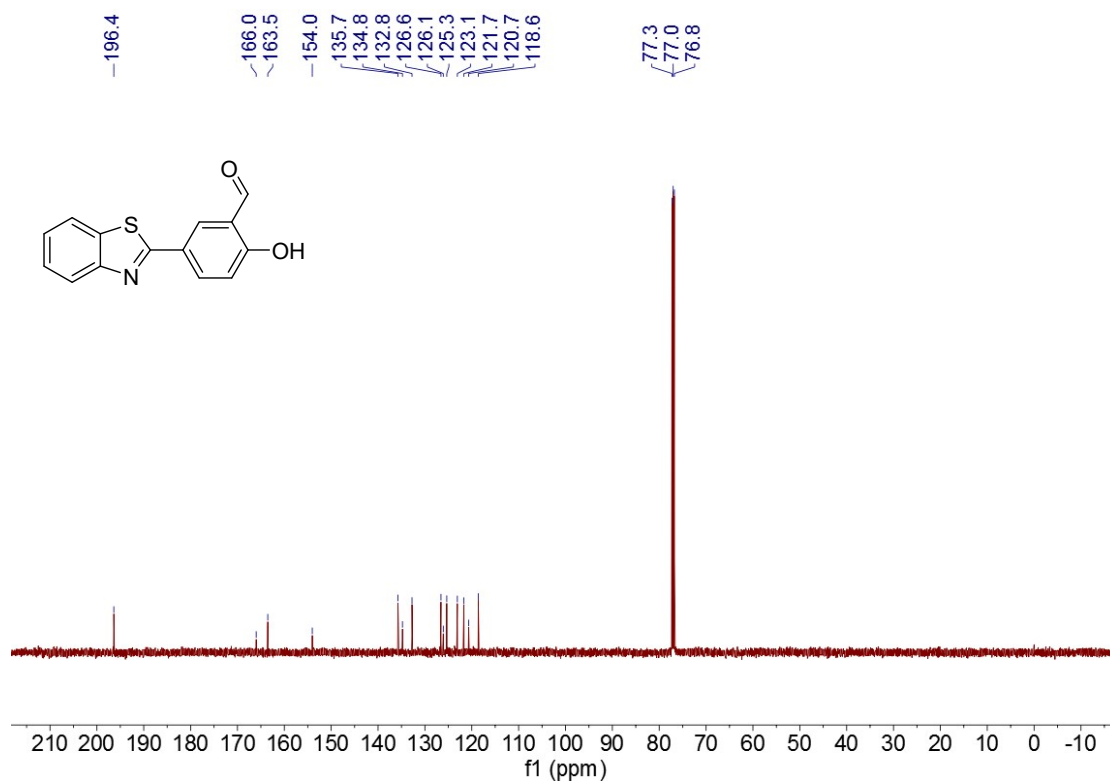

Fig. S16 <sup>13</sup>C NMR spectrum of compound 2 in CDCl<sub>3</sub>.

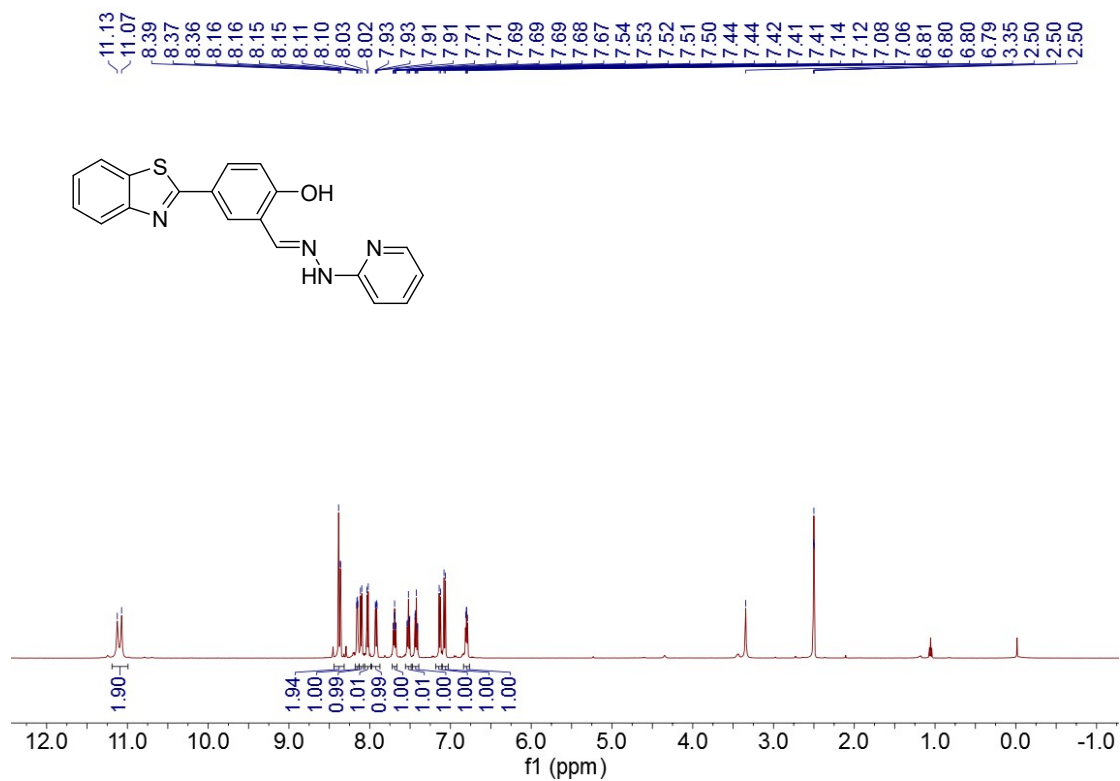

Fig. S17  $^1\text{H}$  NMR spectrum of probe BTB in  $\text{DMSO-}d_6$ .

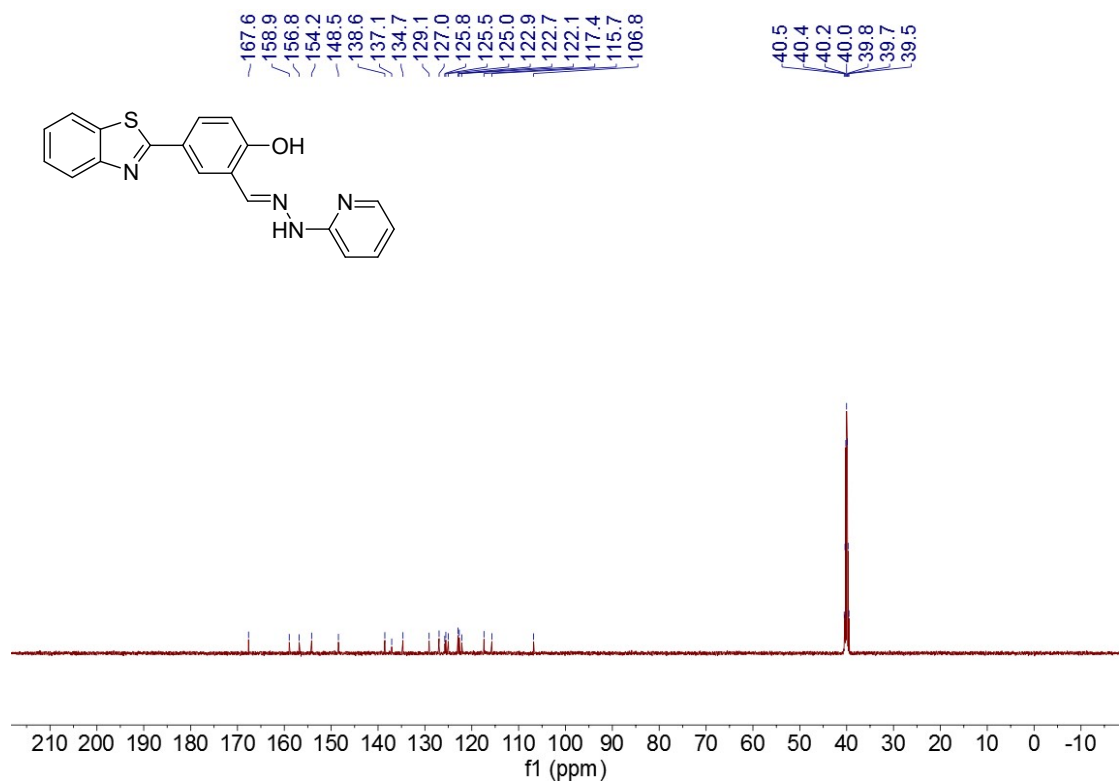

Fig. S18  $^{13}\text{C}$  NMR spectrum of probe BTB in  $\text{DMSO-}d_6$ .

#### IV. Reference

1. T. Liu, X. Wan and Y. Yao, *Sens. Actuators B Chem.*, 2018, 254, 1094-1100.
2. Z.-N. Tian, D.-Q. Wu, X.-J. Sun, T.-T. Liu and Z.-Y. Xing, *Int. J. Mol. Sci.*, 2019, 20.
3. S. Gui, Y. Huang, F. Hu, Y. Jin, G. Zhang, L. Yan, D. Zhang and R. Zhao, *Anal. Chem.*, 2015, 87, 1470-1474.
4. Y. Zhu, X. Gong, Z. Li, X. Zhao, Z. Liu, D. Cao and R. Guan, *Spectrochim. Acta. A Mol. Biomol. Spectrosc.*, 2019, 219, 202-205.
5. C. S. Abeywickrama, K. A. Bertman and Y. Pang, *Chem. Commun.*, 2019, 55, 7041-7044.
6. Q. Zhu, L. Li, L. Mu, X. Zeng, C. Redshaw and G. Wei, *J. Photoch. Photobio. A.*, 2016, 328, 217-224.
7. S. Sen, T. Mukherjee, B. Chattopadhyay, A. Moirangthem, A. Basu, J. Marek and P. Chattopadhyay, *Analyst*, 2012, 137, 3975-3981.
8. Q. Diao, P. Ma, L. Lv, T. Li, Y. Sun, X. Wang and D. Song, *Sens. Actuators B Chem.*, 2016, 229, 138-144.
9. Y.-J. Liu, F.-F. Tian, X.-Y. Fan, F.-L. Jiang and Y. Liu, *Sens. Actuators B Chem.*, 2017, 240, 916-925.
10. D. Wang, X. Fan, S. Sun, S. Du, H. Li, J. Zhu, Y. Tang, M. Chang and Y. Xu, *Sens. Actuators B Chem.*, 2018, 264, 304-311.
11. C. Lim, H. Seo, J.-H. Choi, K.-S. Kim, A. Helal and H.-S. Kim, *Journal of Photochemistry and Photobiology A: Chemistry*, 2018, 356, 312-320.
12. B.-j. Pang, C.-r. Li and Z.-y. Yang, *J. Photoch. Photobio. A.*, 2018, 356, 159-165.
13. S. B. Roy and K. K. Rajak, *J. Photoch. Photobio. A.*, 2017, 332, 505-514.
14. T.-T. Liu, J. Xu, C.-g. Liu, S. Zeng, Z.-Y. Xing, X.-J. Sun and J.-L. Li, *J. Mol. Liq.*, 2020, 300, 112250.
15. Z. Qiao, Y. Wu, B. Tang, R. Perestrelo and R. Bhalla, *Tetrahedron Lett.*, 2019, 60, 150918.
16. X.-J. Sun, T.-T. Liu, N.-N. Li, S. Zeng and Z.-Y. Xing, *Spectrochim. Acta. A Mol. Biomol. Spectrosc.*, 2020, 228, 117786.
17. Neeraj, A. Kumar, V. Kumar, R. Prajapati, S. K. Asthana, K. K. Upadhyay and J. Zhao, *Dalton Trans.*, 2014, 43, 5831-5839.
18. Y. W. Choi, J. J. Lee, E. Nam, M. H. Lim and C. Kim, *Tetrahedron*, 2016, 72, 1998-2005.
19. Z. Liu, Y. Li, Y. Ding, Z. Yang, B. Wang, Y. Li, T. Li, W. Luo, W. Zhu, J. Xie and C. Wang, *Sens. Actuators B Chem.*, 2014, 197, 200-205.
